# Supplementary material for: Study on Intervention Mechanism of Yiqi Huayu Jiedu Decoction on ARDS Based on Network Pharmacology
Source: Hindawi journal article supplement (doi:10.1155/2020/4782470), 2020-01-01

## Target collection

## Network pharmacology analysis

## Experimental support

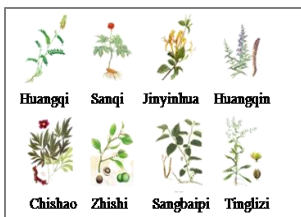

Compound  
database

YQHYJD

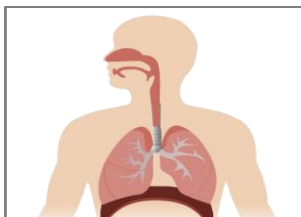

ARDS

Disease target  
database

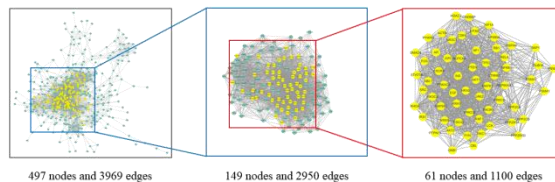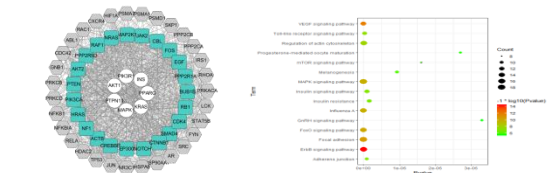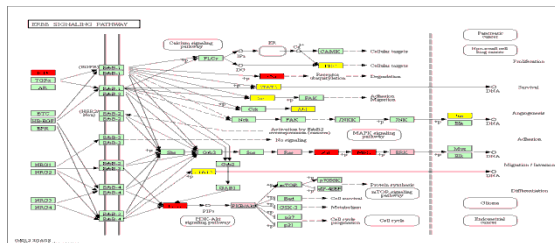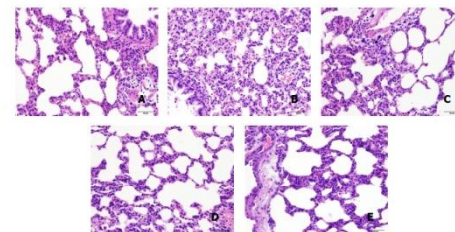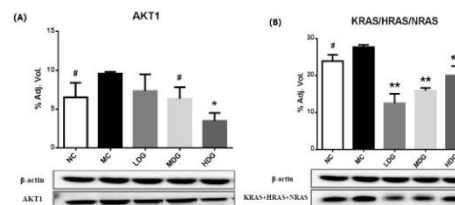

Supplement: f1 [file 4782470.f1.zip]
