# Supplementary material for: Study on Intervention Mechanism of Yiqi Huayu Jiedu Decoction on ARDS Based on Network Pharmacology
Source: Evid Based Complement Alternat Med. 2020 Aug 11;2020:4782470. doi: 10.1155/2020/4782470 (PMC7439204; doi:10.1155/2020/4782470)
Supplement: Supplementary Materials — There are 5 supplementary figures in the submitted supplementary materials. Supplementary Figure 1: Yiqi Huayu Jiedu decoction ingredients, including Radix Astragali ingredients, Panax Notoginseng ingredients, Flos Lonicerae ingredients, Radix Scutellariae ingredients, Radix Paeoniae Rubra ingredients, Fructus Aurantii Immaturus ingredients, Cortex Mori ingredients, and Semen Descurainiae ingredients. Supplementary Figure 2: potential target information of Yiqi Huayu Jiedu decoction. Supplementary Figure 3: GO enrichment analysis of drug prediction target. Supplementary Figure 4: KEGG enrichment analysis of drug prediction target. Supplementary Figure 5: the target information for ARDS diseases. A graphical abstract is also provided. [file 4782470.f1.zip]

Archive with 2 entries (2 files):
- Figures.doc
- Graphical Abstract.pdf
